# Supplementary material
Source: PubMed Central journal article supplement (PMC6714039)
Supplement: jamainternmed-179-1519-s001.pdf [file jamainternmed-179-1519-s001.pdf]

## Supplementary Online Content

Petty LA, Vaughn VM, Flanders SA, et al. Risk factors and outcomes associated with treatment of asymptomatic bacteriuria in hospitalized patients. *JAMA Intern Med*. Published online August 26, 2019. doi:10.1001/jamainternmed.2019.2871

**eAppendix.** Outcome Adjustment Variables

**eReferences.**

**eFigure.** Flow Diagram of Study Population

**eTable 1.** Top Ten Primary Admitting and Discharge Diagnoses Among Treated vs Not Treated Asymptomatic Bacteriuria Patients, N=2733

**eTable 2.** Sensitivity Analyses for Duration of Hospital Stay after Urine Testing for Treatment vs No Treatment of Asymptomatic Bacteriuria, N=2733

This supplementary material has been provided by the authors to give readers additional information about their work.

## **eAppendix. Outcome Adjustment Variables**

Outcomes were adjusted for patient variables found to be significant ( $p < 0.05$ ) and associated with treatment in the bivariate and multivariate analysis and the following:

Mortality, readmissions, ED visits, and discharge to post-acute care facility were adjusted for age, Charlson Comorbidity Index, hospitalization in 90 days preceding current admission, admission from nursing home, and insurance type.<sup>1-4</sup>

*Clostridioides difficile* occurring within 30 days of discharge were adjusted for age, history of antibiotic use (and number of antibiotics) in previous 90 days, admitted from skilled nursing facility, prior hospitalization, proton-pump inhibitor use, immunosuppression, and Charlson Comorbidity Index.<sup>5-7</sup>

Hospital length of stay from date of urine testing were adjusted for age, gender, Charlson Comorbidity Index, prior hospitalization, admission from nursing home, and insurance type.<sup>8,9</sup>

## eReferences.

1. Billings J, Dixon J, Mijanovich T, Wennberg D. Case finding for patients at risk of readmission to hospital: development of algorithm to identify high risk patients. *BMJ*. 2006;333(7563):327.
2. Comette P, D'Hoore W, Malhomme B, Van Pee D, Meert P, Swine C. Differential risk factors for early and later hospital readmission of older patients. *Aging Clin Exp Res*. 2005;17(4):322-328.
3. Allaudeen N, Vidyarthi A, Maselli J, Auerbach A. Redefining readmission risk factors for general medicine patients. *J Hosp Med*. 2011;6(2):54-60.
4. Foraker RE, Rose KM, Suchindran CM, Chang PP, McNeill AM, Rosamond WD. Socioeconomic status, Medicaid coverage, clinical comorbidity, and rehospitalization or death after an incident heart failure hospitalization: Atherosclerosis Risk in Communities cohort (1987 to 2004). *Circ Heart Fail*. 2011;4(3):308-316.
5. Vassallo A, Tran MC, Goldstein EJ. Clostridium difficile: improving the prevention paradigm in healthcare settings. *Expert Rev Anti Infect Ther*. 2014;12(9):1087-1102.
6. Freedberg DE, Salmasian H, Cohen B, Abrams JA, Larson EL. Receipt of Antibiotics in Hospitalized Patients and Risk for Clostridium difficile Infection in Subsequent Patients Who Occupy the Same Bed. *JAMA Intern Med*. 2016;176(12):1801-1808.
7. McCollum DL, Rodriguez JM. Detection, treatment, and prevention of Clostridium difficile infection. *Clin Gastroenterol Hepatol*. 2012;10(6):581-592.
8. Shayne M, Culakova E, Poniewierski MS, et al. Risk factors for in-hospital mortality and prolonged length of stay in older patients with solid tumor malignancies. *J Geriatr Oncol*. 2013;4(4):310-318.
9. Damrauer SM, Gaffey AC, DeBord Smith A, Fairman RM, Nguyen LL. Comparison of risk factors for length of stay and readmission following lower extremity bypass surgery. *J Vasc Surg*. 2015;62(5):1192-1200 e1191.

**eFigure. Flow Diagram of Study Population**

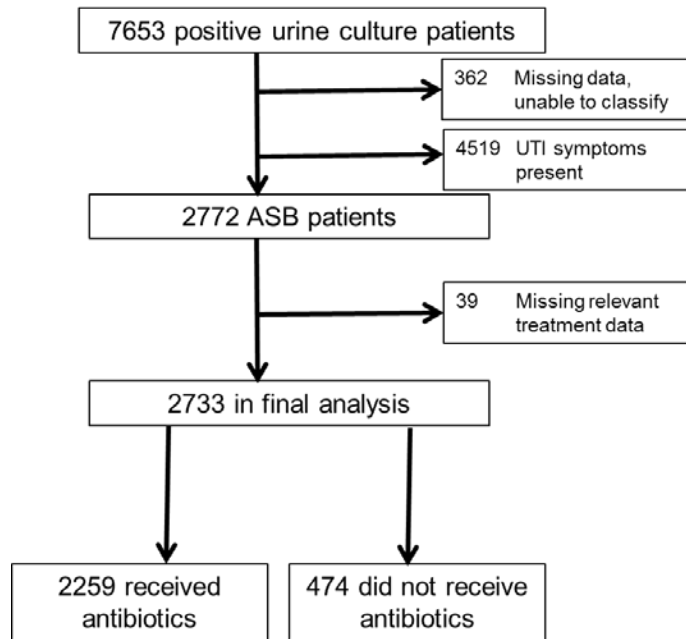

**Signs and Symptoms Attributable to Urinary Tract Infection (without alternative cause):**

1. Urgency, frequency, dysuria
2. Suprapubic pain or tenderness
3. Costovertebral pain or tenderness
4. New onset mental status changes with potential systemic signs of infection (leukocytosis (WBC >10 x 10<sup>9</sup>/L), or hypotension (SBP < 90mmHg), or  $\geq 2$  SIRS criteria<sup>1</sup>)
5. Fever (>38.0°C) or rigors
6. Acute hematuria
7. Increased spasticity or autonomic dysreflexia in a patient with a spinal cord injury

<sup>15</sup>SIRS, systemic inflammatory response syndrome [temperature <36°C (96.8°F) or > 38.0°C (100.4°F), heart rate >90 beats per minute, respiratory rate >20 breaths per minute, white blood cell count <4000/mm<sup>3</sup> or >12000/mm<sup>3</sup>]

**eTable 1. Top Ten Primary Admitting and Discharge Diagnoses Among Treated vs Not Treated Asymptomatic Bacteriuria Patients, N=2733**

| <b>Top Admitting Diagnoses<sup>a</sup> for Treated ASB</b> | <b>N (%)</b> | <b>Top Admitting Diagnoses<sup>a</sup> for Untreated ASB</b> | <b>N (%)</b> |
|------------------------------------------------------------|--------------|--------------------------------------------------------------|--------------|
| Urinary tract infection                                    | 424 (18.8%)  | Congestive heart failure                                     | 37 (7.8%)    |
| Congestive heart failure                                   | 130 (5.8%)   | Fluid and electrolyte disorders                              | 28 (5.9%)    |
| Syncope                                                    | 95 (4.2%)    | Cardiac dysrhythmias                                         | 21 (4.4%)    |
| Missing or unknown                                         | 89 (3.9%)    | Nonspecific chest pain                                       | 21 (4.4%)    |
| Other nervous system disorders                             | 78 (3.5%)    | Gastrointestinal hemorrhage                                  | 21 (4.4%)    |
| Cardiac dysrhythmias                                       | 76 (3.4%)    | Syncope                                                      | 19 (4.0%)    |
| Acute and unspecified renal failure                        | 76 (3.4%)    | Missing or unknown                                           | 16 (3.4%)    |
| Acute cerebrovascular disease                              | 69 (3.1%)    | Other nervous system disorders                               | 15 (3.2%)    |
| Malaise and fatigue                                        | 65 (2.9%)    | Acute cerebrovascular disease                                | 13 (2.7%)    |
| Fluid and electrolyte disorders                            | 62 (2.7%)    | Abdominal pain                                               | 13 (2.7%)    |
| <b>Top Discharge Diagnoses<sup>a</sup> for Treated ASB</b> | <b>N (%)</b> | <b>Top Discharge Diagnoses<sup>a</sup> for Untreated ASB</b> | <b>N (%)</b> |
| Urinary tract infection                                    | 485 (21.5%)  | Congestive heart failure                                     | 35 (7.4%)    |
| Missing or unknown                                         | 52 (6.7%)    | Acute and unspecified renal failure                          | 32 (6.8%)    |
| Congestive heart failure                                   | 117 (5.2%)   | Fluid and electrolyte disorders                              | 31 (6.5%)    |
| Acute and unspecified renal failure                        | 93 (4.1%)    | Cardiac dysrhythmias                                         | 26 (5.5%)    |
| Other nervous system disorders                             | 82 (3.6%)    | Missing or unknown                                           | 17 (3.6%)    |
| Cardiac dysrhythmias                                       | 73 (3.2%)    | Other nervous system disorders                               | 15 (3.2%)    |
| Fluid and electrolyte disorders                            | 73 (3.2%)    | Gastrointestinal hemorrhage                                  | 15 (3.2%)    |
| Acute cerebrovascular disease                              | 62 (2.7%)    | Acute cerebrovascular disease                                | 13 (2.7%)    |
| Septicemia                                                 | 58 (2.6%)    | Intestinal obstruction without hernia                        | 12 (2.5%)    |
| Gastrointestinal hemorrhage                                | 57 (2.5%)    | Deficiency and other anemia                                  | 12 (2.5%)    |

<sup>a</sup>Primary diagnoses

ASB, asymptomatic bacteriuria

**eTable 2. Sensitivity Analyses for Duration of Hospital Stay after Urine Testing for Treatment vs No Treatment of Asymptomatic Bacteriuria, N=2733**

| Outcome                                                                                                                       | Antibiotics Median [IQR]<br>N | No Antibiotics Median [IQR]<br>N | Unadjusted RR (95% CI) | Unadjusted P-value | Adjusted RR (95% CI) | Adjusted P-value |
|-------------------------------------------------------------------------------------------------------------------------------|-------------------------------|----------------------------------|------------------------|--------------------|----------------------|------------------|
| Duration of hospitalization, only if urine testing sent on hospital day 1 <sup>a</sup>                                        | 5 days [3, 6]<br>N=1754       | 3 days [3, 5]<br>N=314           | 1.35 (1.24, 1.48)      | <.0001             | 1.33 (1.22, 1.46)    | <.0001           |
| Duration of hospitalization, only if urine testing sent on hospital day 1, antibiotics started on hospital day 1 <sup>a</sup> | 4 days [3, 6]<br>N=1496       | 3 days [3, 5]<br>N=314           | 1.31 (1.18, 1.45)      | <.0001             | 1.27 (1.15, 1.40)    | <.0001           |

Outcomes were adjusted for patient variables found to be significant ( $p < 0.05$ ) and associated with treatment in the bivariate and multivariate analysis and the following:

<sup>a</sup>From date of urine testing (either urine culture or urinalysis, whichever sent first). Adjusted for age, gender, Charlson Comorbidity Index, prior hospitalization, admission from nursing home, and insurance type  
CI, confidence interval; RR, relative risk
